# Supplementary material for: The Synergistic Effect of Nitrogen Dopant and Calcination Temperature on the Visible-Light-Induced Photoactivity of N-Doped TiO2
Source: Hindawi journal article supplement (doi:10.1155/2013/268723), 2013-01-01
Supplement: f1 [file 268723.f1.pdf]

# Blank Experiment

## 1. Blank Test of Whole System

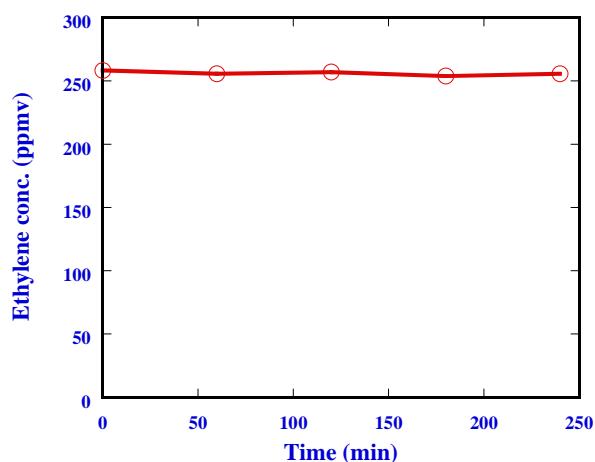

Figure S.1 Blank Test of Whole System.

**Experiment condition :** flow rate = 3000 mL/min, initial ethylene concentration = 258 ppmv, relative humidity = 5%, oxygen concentration = 210000 ppmv, reaction temperature = 25 °C.

## 2. Blank Test of Adsorption

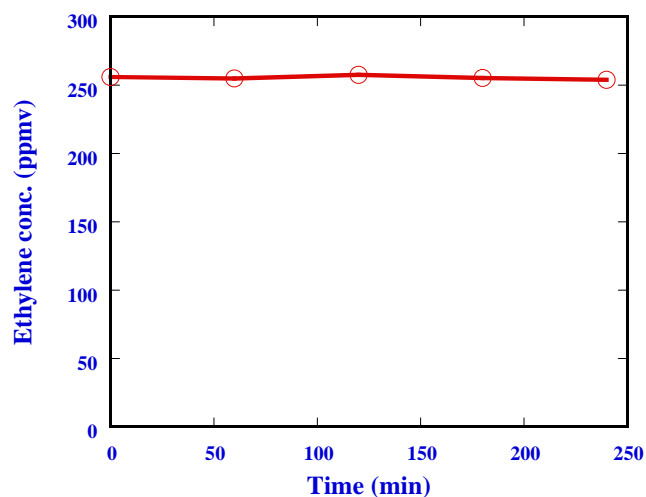

Figure S.2 Blank Test of Adsorption.

**Experiment condition :** flow rate = 3000 mL/min, initial ethylene concentration = 256 ppmv, relative humidity = 5% , oxygen concentration = 210000 ppmv, reaction temperature = 25 °C.

### 3. Blank Test of Visible-Light

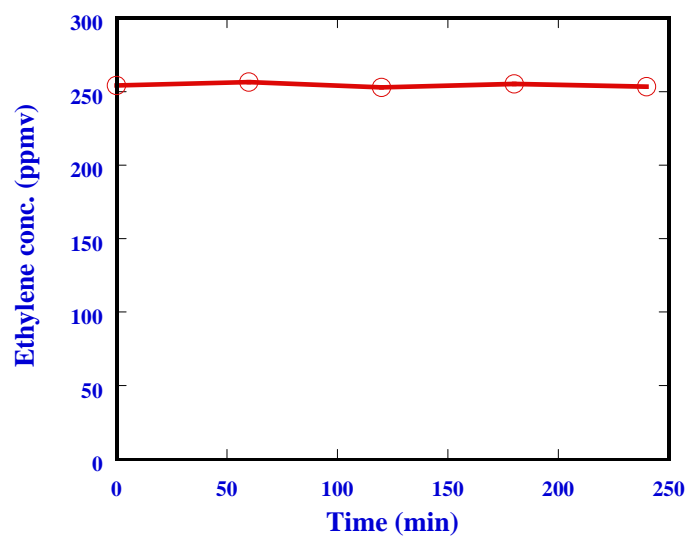

Figure S.3 The Ethylene Degradation of Visible Light without Photocatalyst.

**Experiment condition :** flow rate = 3000 mL/min, initial ethylene concentration = 254 ppmv, relative humidity = 5% (absolute humidity = 1561 ppmv), oxygen concentration = 210000 ppmv, visible light intensity = 8 mW/cm<sup>2</sup>, reaction temperature = 25 °C.
